# Supplementary material for: The Impact of Type VI Secretion System, Bacteriocins and Antibiotics on Bacterial Competition of Pectobacterium carotovorum subsp. brasiliense and the Regulation of Carbapenem Biosynthesis by Iron and the Ferric-Uptake Regulator
Source: Front Microbiol. 2019 Oct 18;10:2379. doi: 10.3389/fmicb.2019.02379 (PMC6813493; doi:10.3389/fmicb.2019.02379)
Supplement: Supplementary file 7 [file Table_4.xls]

## Sheet: Sheet1
Supplementary Table S4. Host range of killing by the Pcb1692 bacteriocin. Pcb1692 and its isogenic mutant strains were spotted on LB and grown overnight. (A) Log10 fold change of recovered target bacteria following coculture with Pcb1692. (B) Carbapenem production by strains of Pcb and (C) Bacteriocin production by Pcb1692 following mitomycin C treatment.
										A) Bacterial competition on LB agar
	PcbXT3	PcbXT10	PcbG4P5	PcbG4P7	PcbHPI01	Pcb358	PcbCC1	PcbCC2	Pcc (type)	Pcc1	Pcc2	PccBR1	PccBR3	PccBR7	PccRP6P2	PccGP6P1	PccYP10R2	PccRP17P1	PccRP17P2	D. dadantii	D. paradisiaca	Bacillus cereus	P. atrosepticum	D.chrysanthemi	P.wasabiae	S.marcescens
Pcb1692	5	5	5	5	0	0	0	0	5	5	4	0	0	0	1	2	2	3	3	6	5	0	6	0	0	1
										B) Carbapenem production
	PcbXT3	PcbXT10	PcbG4P5	PcbG4P7	Pcc (type)	Pcc1	Pcc2	PccBR1	PccBR3	PccBR7	PccRP6P2	PccGP6P1	PccYP10R2	PccRP17P1	PccRP17P2	D. dadantii	D. paradisiaca	Bacillus cereus	P. atrosepticum	D.chrysanthemi	P.wasabiae	S.marcescens
Pcb1692	˖˖	˖˖	˖˖	˖˖	˖˖	˖˖	˖˖	˗	˗	˗	˖	˖	˖	˖	˖	˖˖	˖˖	˗	˖˖	˗	˗	˗
PcbHPI01	˖˖	˖˖	˖˖	˖˖	˖˖	˖˖	˖˖	˗	˗	˗	˖	˖	˖	˖	˖	˖˖	˖˖	˗	˖˖	˗	˗	˗
PcbXT3	˗	˗	˗	˗	˗	˗	˗	˗	˗	˗	˗	˗	˗	˗	˗	˗	˗	˗	˗	˗	˗	˗
PcbXT10	˗	˗	˗	˗	˗	˗	˗	˗	˗	˗	˗	˗	˗	˗	˗	˗	˗	˗	˗	˗	˗	˗
PcbG4P5	˗	˗	˗	˗	˗	˗	˗	˗	˗	˗	˗	˗	˗	˗	˗	˗	˗	˗	˗	˗	˗	˗
PcbG4P7	˗	˗	˗	˗	˗	˗	˗	˗	˗	˗	˗	˗	˗	˗	˗	˗	˗	˗	˗	˗	˗	˗
Pcb358	˖˖	˖˖	˖˖	˖˖	˖˖	˖˖	˖˖	˗	˗	˗	˖	˖	˖	˖	˖	˖˖	˖˖	˗	˖˖	˗	˗	˗
PcbCC1	˖˖	˖˖	˖˖	˖˖	˖˖	˖˖	˖˖	˗	˗	˗	˖	˖	˖	˖	˖	˖˖	˖˖	˗	˖˖	˗	˗	˗
PcbCC2	˖˖	˖˖	˖˖	˖˖	˖˖	˖˖	˖˖	˗	˗	˗	˖	˖	˖	˖	˖	˖˖	˖˖	˗	˖˖	˗	˗	˗
										C) Bacteriocin production following mitomycin C treatment
	PcbXT3	PcbXT10	PcbG4P5	PcbG4P7	Pcc (type)	Pcc1	Pcc2	PccBR1	PccBR3	PccBR7	PccRP6P2	PccGP6P1	PccYP10R2	PccRP17P1	PccRP17P2	D. dadantii	D. paradisiaca	Bacillus cereus	P. atrosepticum	D.chrysanthemi	P.wasabiae	S.marcescens
Pcb1692	˖˖	˖˖	˖˖	˖˖	˖˖	˖˖	˖˖	˗	˗	˗	˖	˖	˖	˖	˖	˖˖	˖˖	˖˖˖	˖˖	˗	˗	˗
PcbHPI01	˖˖	˖˖	˖˖	˖˖	˖˖	˖˖	˖˖	˗	˗	˗	˖	˖	˖	˖	˖	˖˖	˖˖	˖˖˖	˖˖	˗	˗	˗
PcbXT3	˗	˗	˗	˗	˗	˗	˗	˗	˗	˗	˗	˗	˗	˗	˗	˗	˗	˗	˗	˗	˗	˗
PcbXT10	˗	˗	˗	˗	˗	˗	˗	˗	˗	˗	˗	˗	˗	˗	˗	˗	˗	˗	˗	˗	˗	˗
PcbG4P5	˗	˗	˗	˗	˗	˗	˗	˗	˗	˗	˗	˗	˗	˗	˗	˗	˗	˗	˗	˗	˗	˗
PcbG4P7	˗	˗	˗	˗	˗	˗	˗	˗	˗	˗	˗	˗	˗	˗	˗	˗	˗	˗	˗	˗	˗	˗
Pcb358	˖˖	˖˖	˖˖	˖˖	˖˖	˖˖	˖˖	˗	˗	˗	˖	˖	˖	˖	˖	˖˖	˖˖	˖˖˖	˖˖	˗	˗	˗
PcbC1	˖˖	˖˖	˖˖	˖˖	˖˖	˖˖	˖˖	˗	˗	˗	˖	˖	˖	˖	˖	˖˖	˖˖	˖˖˖	˖˖	˗	˗	˗
PcbC2	˖˖	˖˖	˖˖	˖˖	˖˖	˖˖	˖˖	˗	˗	˗	˖	˖	˖	˖	˖	˖	˖˖	˖˖˖	˖˖	˗	˗	˗
	Pcb = Pectobacterium carotovorum subsp. brasiliense, Pcc = Pectobacterium carotovorum subsp. carotovorum, D = Dickeya, P = Pectobacterium, S = Serratia
	Diameter of zones of inhibition: + = 0 - 0.5cm, ++ = 0.5-1cm, +++ = 1-2cm
	Numbers in A represent the log10 CFU/ml of recovered targeted bacteria following co-culture with Pcb1692 on LB agar
